# Supplementary material
Source: publisher site journal article supplement (https://www.spandidos-publications.com/1679/downloadSupplementary)
Supplement: Supplementary file 1 [file downloadSupplementary]

## Sheet: Table S2
Table SII. A full list of all novel sRNAs that passed filter on normality test with Shapiro_Wilk (p > 0.95)
Gene ID	054ASM(normalized)	075ASM(normalized)	124ASM(normalized)	143ASM(normalized)	154ASM(normalized)	200ASM(normalized)	212ASM(normalized)	131ASP(normalized)	146ASP(normalized)	151ASP(normalized)	152ASP(normalized)	167ASP(normalized)	172ASP(normalized)	182ASP(normalized)	188ASP(normalized)	002HC(normalized)	003HC(normalized)	004HC(normalized)	005HC(normalized)	006HC(normalized)	Gene Type
NEWGENE8	-13112726	-0.82274914	-10382156	-0.11887455	0.87956524	-12200599	-0.109755516	-0.538702	0.50714874	10151463	0.04412651	-0.04412651	-12995996	0.3009882	-0.9230108	4701048	56808453	36517048	64532204	55150003	Unknown
NEWGENE426	0.27096272	-0.06519866	0.51440716	-0.0963161	-0.4396751	0.5317626	0.06519866	0.53449726	0.20963645	-0.11071348	-0.24013829	-11017601	0.9058671	-0.7296939	-0.31540632	-36344843	34978867	-0.7166889	16715121	0.5353675	Unknown
NEWGENE1104	-0.3295517	-0.4398241	14935894	0.82017136	11332388	22196875	0.9710789	-15361586	12187719	0.47162342	-0.073337555	-0.159626	28850498	0.07333851	17040825	-37280912	-57817497	-4370055	-5218583	-45727997	snoRNA
NEWGENE1111	11587114	-0.021066666	0.7924614	0.7924614	0.465827	15599775	0.465827	-11532812	0.6071968	-0.2148056	-0.8073673	-0.9179239	1289176	0.021066666	0.88527966	-47029386	-61355314	-4370119	-5118693	-4537398	snoRNA
NEWGENE568	-0.12788868	-0.46060658	-0.87065935	0.00435257	-0.00435257	-0.35208416	0.40922832	0.309453	-0.5045676	0.16512632	-0.86935234	-0.06548357	-0.33145046	-0.4861312	0.14233685	31712613	29691339	3391748	2309741	2771069	Unknown
NEWGENE1117	0.28805184	0.7250459	0.057136536	-0.057136536	-13556092	-0.21587491	-0.67337275	0.4397967	-0.28905034	-0.65108776	-14871025	-0.7882042	0.75377727	-26140618	-0.21723461	23323567	6028122	29377491	42255926	0.8093188	miRNA
NEWGENE57	0.019494057	-0.3293047	0.17168236	0.12926817	-0.16337252	0.3167739	0.027812004	0.75059175	0.6576257	0.104819775	-0.10720539	0.29268837	16833615	-0.88233185	-0.01949358	-18629196	-11324692	-0.4323516	-20076	-0.19632483	Unknown
NEWGENE845	-0.2057128	-0.060634136	-0.63020897	0.679687	-0.95607805	-18298469	-14116321	-0.14032555	0.060634136	0.088182926	0.14371347	0.4594388	-0.09321642	-0.7194619	-10542192	35394087	55153875	33682232	5255744	44786263	Unknown
NEWGENE851	-0.9357872	0.5159521	-0.24759722	0.17145681	0.9772029	-0.3832593	0.4989376	0.5183954	0.28211927	0.72158766	12058067	1254827	0.002623081	-0.002622604	-0.6011138	-2644862	-17886777	-0.99077463	-27895424	-15061064	Unknown
NEWGENE971	0.18101501	-10582049	-0.63594365	-0.49531722	-0.06069708	0.45302343	-15807531	-2108021	-0.51560354	-1550214	-1027919	-16748774	0.06069708	0.3572197	14980283	16392765	12947259	11363182	20497355	2175415	Unknown
NEWGENE982	-10297668	0.30667663	0.17597008	-0.07218313	0.75121665	-0.79256034	-0.76883936	11427987	-0.09660816	0.19732547	14080656	0.4584272	-0.2810812	-0.57640386	-16718411	-0.21060324	13035433	16228573	-0.35528374	0.07218313	Unknown
NEWGENE983	-0.36606646	-0.087854385	-0.63491154	-0.87003684	-0.33012724	-0.7095568	-0.41252708	0.97966003	0.49271393	0.6050472	-0.2441268	0.087854385	0.6790185	-0.6381829	0.39978933	12796111	10255599	0.6911235	0.42447853	-0.3722334	Unknown
NEWGENE1054	-32066693	-0.93163204	-17697091	-0.7940154	-0.14971495	-0.10659361	1200644	-15822282	0.1861391	0.33601713	0.16975689	0.8341007	-11458609	0.10659361	-19935658	-0.5806322	0.6397424	0.70992327	0.11790371	0.5535164	Unknown
NEWGENE1193	-0.27320766	0.012943268	0.09898853	-0.19941378	0.25150728	-0.13111544	-0.3610878	0.60518456	-0.013012409	0.07349968	-0.23614788	0.27907562	0.8091526	-0.9513798	0.39867783	-0.15412855	24077606	-0.2707739	13710823	-0.012942791	tRNA
NEWGENE99	-2080094	-0.36140108	-0.42583084	-13249376	0.20996475	-11873837	-0.7924781	-0.9526651	-0.37832308	0.44204378	0.38964558	0.5355525	0.13964653	-0.13964653	-1253804	3627946	4184972	30637832	3772975	3851097	Unknown
NEWGENE119	-0.8764963	-0.8319025	-0.08736181	-0.27776432	-0.19794846	0.16074324	-0.2723875	-0.16429329	0.08736229	-0.30276108	0.35117483	0.7113981	12318797	-10700564	-0.17850971	0.94115734	4452221	0.27176666	26311598	0.79139996	Unknown
NEWGENE159	-14619462	0.1031065	-0.527967	-0.8658061	0.45398712	10361695	14084845	-12431705	0.92963505	-0.10310602	-0.61172056	-0.35702658	-0.78154016	-0.117943764	-0.25362492	50504093	63072786	4496172	42032957	4881489	Unknown
NEWGENE81	152777	24846892	0.7146363	-24448452	0.1209681	-0.41784525	-0.1209681	-27985444	-0.6953583	0.30861807	-0.15805411	-0.61141944	-13174872	-0.6476097	-13313296	22692962	385423	26273599	17535963	35218754	Unknown
NEWGENE1221	0.7206993	13803911	0.92566395	0.10571909	-13991961	-0.3941183	-0.10571957	0.53782034	-0.22523355	-0.6256046	-0.45027256	-0.11774206	-0.60989714	-0.661479	-0.72803736	2471099	58723392	37971268	48686266	1886116	snoRNA
NEWGENE156	-0.061442375	10066605	-0.79235196	-0.69952726	-12069354	-17875497	-0.7423961	0.77072	0.17430162	0.013020992	0.4307003	-0.19074774	-0.2532525	-0.9066713	-0.013020515	70104733	63606844	6807665	6661312	6906967	Unknown
NEWGENE917	-0.5074215	0.22253847	-15250115	-0.9837415	0.35609722	0.1312046	0.742753	-11702032	0.41843414	-0.2153449	-0.7604909	-18189895	-0.9844022	-0.1312046	-0.91935635	29277267	33781767	28014936	35375643	34020233	Unknown
NEWGENE938	-0.017929077	0.36120224	0.16744375	-0.54589653	-0.10413742	0.017929077	-0.40024328	-0.8136966	0.45045567	0.1814413	-0.5019789	0.7359247	12048249	-0.7455857	0.4650283	-47241373	0.39056587	-0.17730284	0.8660927	-0.18563366	Unknown
NEWGENE942	-0.13126945	13232718	-0.9056301	0.361938	0.8121109	-0.2611928	0.5070052	0.13479567	-0.046432495	0.34076738	0.3904314	0.7643919	-0.8606701	0.13479567	-14161315	-2229641	-0.0200696	-0.28479052	-0.6129241	0.020069122	Unknown
NEWGENE945	11190891	-0.7817173	-15387385	-0.22566223	-1819843	0.22566223	-0.39226246	3312564	-15745177	-23552778	0.2380991	-13281515	-14367201	0.65977526	-0.47421646	29918137	32742138	37062187	23146396	4143074	Unknown
NEWGENE208	-30057263	-1377944	-0.096520424	0.046298027	0.7177763	0.37202454	-0.17063713	-12979898	-0.24179077	-0.79302025	11126318	0.19555473	-0.82940483	-0.046298027	-17380533	24738932	31777105	2554718	24074268	26237888	Unknown
NEWGENE271	-31306279	-17324119	-12190812	-0.005908012	-0.2714305	-0.67083883	0.06035757	-18699048	-0.6086633	0.4154334	0.7326951	14493008	-11128867	0.005908489	-0.7646098	26909862	2063673	23927307	2065865	17276354	Unknown
NEWGENE1301	-0.4323578	0.5942116	0.20361042	0.9641876	0.049633026	-0.5931244	0.69647694	15808916	0.8645859	0.2257967	-0.46677303	0.62660885	-11875257	-0.049632072	0.918684	-38964834	-21476674	-17210541	-21355605	-3010047	tRNA
NEWGENE1021	-0.32907295	14415674	-18123193	-0.90547824	-0.035155296	-0.8051152	0.14130187	-0.10577512	0.2837553	0.035155058	-0.65389395	-10901821	-1713934	0.13267064	-14018357	36259704	41874514	29539733	38413334	3870349	Unknown
NEWGENE1317	0.47523594	0.26349163	-0.05147457	0.6986475	0.051473618	10037193	0.5246954	0.36512184	-0.24436092	-0.35402012	-0.24889565	-0.4467554	0.7800007	0.051473618	0.79554844	-3236413	-29994888	-3738769	-4217303	-35319629	miRNA
NEWGENE264	-16678944	-0.4543085	-0.88156414	-0.7241316	0.39616823	-14111063	-0.002552748	-13879917	-5.63E-04	0.62760544	0.44796276	0.6105609	5.63E-04	-0.12646246	-0.38315773	4379354	36065583	41906867	3691553	38552551	Unknown
NEWGENE322	-12517366	-0.13003445	-0.6649947	0.046791077	0.8012991	-0.29561424	0.43251324	-0.21092224	-0.4671049	0.55665874	0.49288082	0.7058859	-0.91118526	0.43251324	-100629	-0.27572918	0.7257519	0.3787918	-0.04679203	0.45157623	Unknown
NEWGENE323	-17638156	-0.5463505	-0.88306093	0.4492545	-0.3975253	-0.07287216	-0.6728897	21833858	-0.112109184	0.012924194	0.7027998	15936952	-0.79901123	-0.012924671	-0.14493227	20390863	0.27861214	23886347	12622104	1128129	Unknown
NEWGENE338	-0.6751957	-0.25379252	-0.9567549	0.6711676	-0.88220453	0.25752974	-15346006	-0.2539928	-0.66156673	-0.07919121	0.573601	0.07919097	0.56964636	-0.5275316	-0.58370376	2565916	39869175	28088007	39330559	39716911	Unknown
NEWGENE1354	10565081	0.7779131	0.82354355	0.49287987	0.056451797	14239016	0.27635956	-14097195	0.24651718	-0.70296574	-0.57844067	-0.76976013	20457287	-0.056451797	15792103	-50539975	-6305938	-534591	-4784401	-4741302	snoRNA
NEWGENE497	-0.07432604	0.8148074	-0.80518913	0.10956812	-0.5020251	-12728286	0.030715466	0.7619324	-0.511981	0.04733038	0.21480608	-0.030714989	-11238132	0.701283	-11675105	0.6414709	0.12895107	-11173301	-0.073934555	0.8731313	Unknown
NEWGENE557	-0.0264225	0.4029107	-0.5617342	-10302272	0.13684464	-24907932	-12889509	0.11179733	-12623177	0.026422977	-0.3453989	0.6873846	-0.38416767	-0.85755634	-0.53204155	50091677	4833906	47610674	47849655	51307793	Unknown
NEWGENE1376	-0.10759735	-0.2655592	0.2977543	0.19238377	-0.05821991	0.44674015	0	1031702	0.2977543	-0.08657169	0.97910404	0.67100906	16348867	-0.81356525	0	-16141605	0.10846138	-21587744	-1474163	-2413787	snoRNA
NEWGENE912	-0.40718937	-0.4962721	14299479	0.8650923	10541792	22412663	0.9652195	-16953754	12163391	0.4666252	-0.21535397	-0.12215614	25005703	0.12215614	13018723	-36975021	-57542086	-44140844	-5227728	-46208296	Unknown
NEWGENE602	2166479	28777037	-19668362	0.09199953	-0.346941	-0.6372833	15556684	18646765	10915732	-0.09200001	-11025226	0.7015457	-17252741	-0.6842475	-0.12146044	-0.66387606	15027242	14736304	16355767	-0.3934002	Unknown
NEWGENE412	-0.5028372	-10045967	0.18011951	-14879813	10104432	-0.16032076	-0.14195538	-16770685	-0.13218164	0.4682765	0.237988	-11150882	0.5422478	0.6825032	-0.4508071	0.13218164	0.43584728	0.3749795	0.2877078	-0.14035225	Unknown
NEWGENE458	-3920196	-15429835	0.08200216	-10166163	-0.08200216	-0.5993366	0.18074274	0.1742611	-12709937	-0.56646204	0.5146589	13573232	-0.7880907	-0.09081817	-27362742	0.8163171	17222705	15638628	15955095	17144127	Unknown
NEWGENE538	-0.040839672	0.23844194	-0.6448307	-0.42839956	-0.13868809	-10519555	0.47493696	0.6266594	0.7013335	0.07787514	-12748358	-0.80923796	-20795865	-0.34269428	-10932825	12678194	11471786	17033577	19009681	0.040839195	Unknown
NEWGENE812	-0.2753172	0.46302462	0.012889862	-0.23661327	-0.039217472	-0.1449523	12802968	0.44251204	11934743	0.7151828	-0.16238928	0.43370485	-0.47849417	0.24509716	0.9442439	-5079233	-0.68415356	-0.2489171	0.22676325	-0.012890339	Unknown
NEWGENE829	-0.22095108	10078454	-0.03312874	0.27824116	0.16408825	-0.7741699	0.6779647	11235862	0.90645075	-0.25820446	-0.72002983	0.20825863	-0.7381253	-0.12673903	0.5134444	-14744668	-0.23889351	0.5225258	0.03312874	-10684323	Unknown
NEWGENE533	-23088646	-0.35181904	-0.4914093	-0.9682524	0.43276978	-13638377	-0.017910957	-0.59602165	0.017910957	19117918	16400061	23520713	-0.45390558	-0.10688114	-14174213	0.56966686	19939055	12278643	0.94992924	0.92109346	Unknown
NEWGENE1519	-0.036510468	0.80015564	0.08432102	10852852	-0.036510468	-0.6857405	0.59904766	15826874	0.94876194	0.12604046	-0.6214199	0.36382675	-0.9540129	0.036510468	0.94876194	-29568453	-1567749	-16418066	-14029961	-26806898	snoRNA
NEWGENE657	-0.2451582	-16954529	-0.69839144	220817	12710195	0.6379509	-0.39097357	13837452	-0.058525562	0.04432583	0.8956289	-0.04432583	-0.2384305	0.27114105	0.18331337	-0.08909464	-43571224	0.87608624	-11020548	0.47743893	Unknown
NEWGENE671	-0.7008524	-0.508713	0.5511334	-1063204	-0.018624783	-0.44406438	0.106318235	0.2665937	-12889359	-0.3462677	0.018625021	13335848	-0.50028086	-11118947	-0.27746892	57123857	534082	5191695	50872707	59253373	Unknown
NEWGENE612	0.7565255	-0.6480937	-0.12759209	0.330225	0.11315584	11737366	-0.026160717	10220003	-0.48618364	-0.48618364	0.7411027	0.012700081	0.15590906	-0.012700081	0.2969222	-0.23727608	-0.7497959	0.21557808	-0.95268154	-0.4757862	Unknown
NEWGENE747	-13496752	-0.00685215	0.16961527	-0.14294314	0.7642422	-0.005389214	0.94127846	-0.6793239	-0.04090476	-0.42561054	-0.16222501	0.005389452	-14461985	0.566545	-0.82601714	36998544	560637	35361195	37831283	46316013	Unknown
NEWGENE767	0.7842102	1694725	-0.09431648	0.3688326	0.04999447	-0.6776209	0.6935663	19728079	11085949	-0.19860172	-0.9383192	-0.4101658	-0.79009724	-0.13932037	13704472	-0.6975012	-0.049995422	0.34060192	0.22753334	-0.84031963	Unknown
NEWGENE784	-11467187	0.58904314	-0.094239235	-0.29729033	-13654637	-0.9056177	-0.6293206	13475628	-0.08680105	0.08680105	0.6682091	19005628	-0.92763567	-11976378	-13439128	3665905	7425297	4119856	62377214	36541157	Unknown
